# Supplementary material for: Candidate tumor suppressor ZNF154 suppresses invasion and metastasis in NPC by inhibiting the EMT via Wnt/β-catenin signalling
Source: PubMed Central journal article supplement (PMC5689643; doi:10.18632/oncotarget.20479), 2017-08-24
Supplement: oncotarget-08-85749-s001.pdf [file oncotarget-08-85749-s001.pdf]

## Candidate tumor suppressor ZNF154 suppresses invasion and metastasis in NPC by inhibiting the EMT via Wnt/ $\beta$ -catenin signalling

### SUPPLEMENTARY MATERIALS

Supplementary Table 1: Comparisons of the intensity of bands on the western blot in Figure 3A

|                   | 5-8F   |        | C666-1 |        |
|-------------------|--------|--------|--------|--------|
|                   | Vector | ZNF154 | Vector | ZNF154 |
| ZNF154            | 1      | 3.9292 | 1      | 3.7145 |
| E-Cadherin        | 1      | 1.3840 | 1      | 2.6657 |
| $\alpha$ -Catenin | 1      | 1.4324 | 1      | 2.0908 |
| Vimentin          | 1      | 0.2403 | 1      | 0.9570 |
| Fibronectin       | 1      | 0.0689 | 1      | 0.0632 |

**Supplementary Table 2: Comparisons of the intensity of bands on the western blot in Figure 3B**

|                  | 5-8F   |        | C666-1 |        |
|------------------|--------|--------|--------|--------|
|                  | Vector | ZNF154 | Vector | ZNF154 |
| $\beta$ -Catenin | 1      | 0.5311 | 1      | 0.7714 |
| GSK-3 $\beta$    | 1      | 1.0611 | 1      | 1.1050 |
| p-GSK-3 $\beta$  | 1      | 0.6696 | 1      | 0.4902 |
| Snail            | 1      | 0.6899 | 1      | 0.5587 |
